# Supplementary material for: Insight Into the Interaction Between RNA Polymerase and VPg for Murine Norovirus Replication
Source: PubMed Central journal article supplement (PMC6046605; doi:10.3389/fmicb.2018.01466), 2018-07-03
Supplement: Presentation_1.pdf [file Presentation_1.pdf]

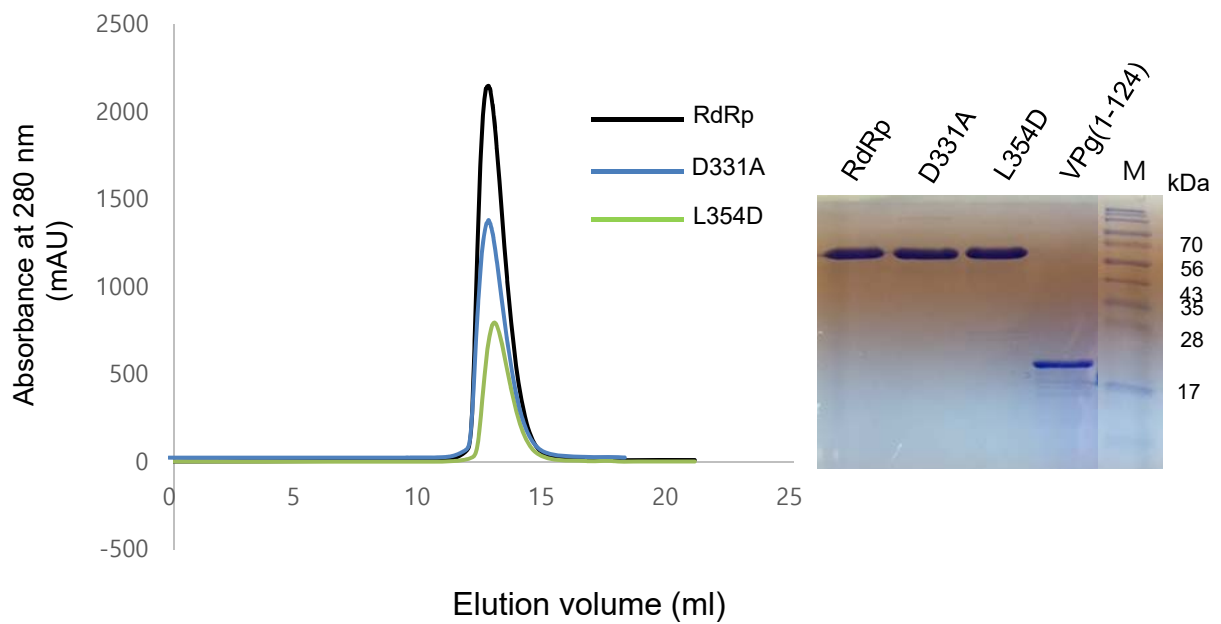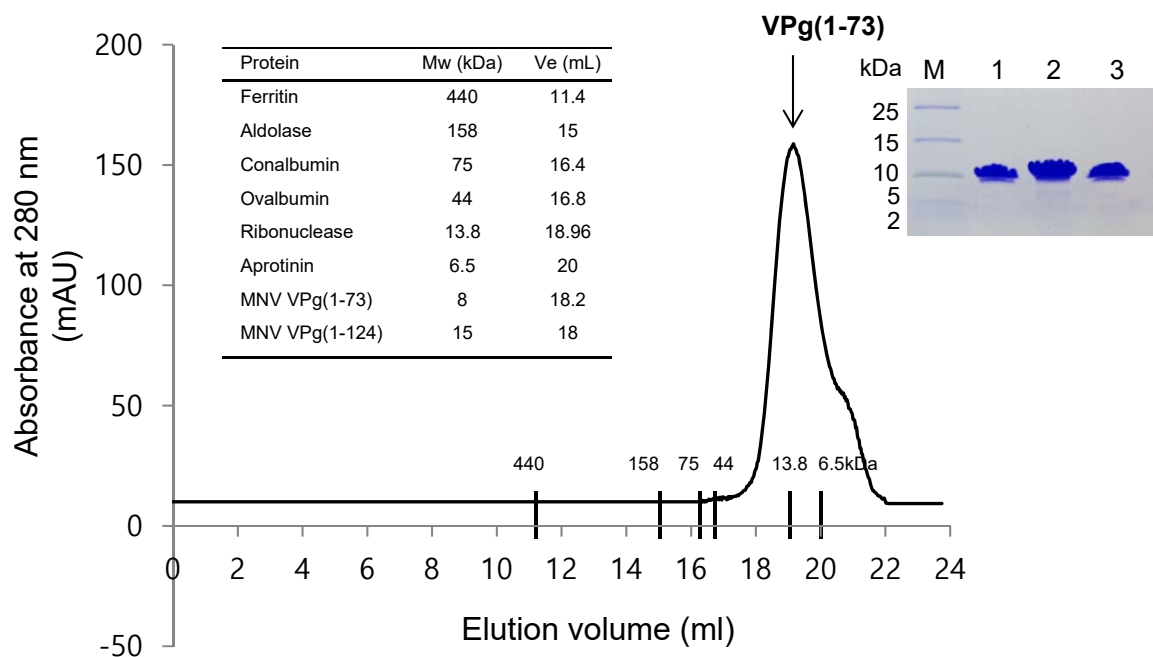

**Figure S1. Elution profiles of the MNV-1 RdRp and VPg(1-73) from gel filtration chromatography.** RdRp native and mutants and VPg(1-124) were purified using superdex 200 gel filtration chromatography and analysed by SDS-PAGE (upper panel), and VPg(1-73) was purified using superdex 75 gel filtration chromatography and analysed by tricine-SDS-PAGE (inset) (lower panel).
