# Supplementary material for: Insight Into the Interaction Between RNA Polymerase and VPg for Murine Norovirus Replication
Source: PubMed Central journal article supplement (PMC6046605; doi:10.3389/fmicb.2018.01466), 2018-07-03
Supplement: Presentation_4.pdf [file Presentation_4.pdf]

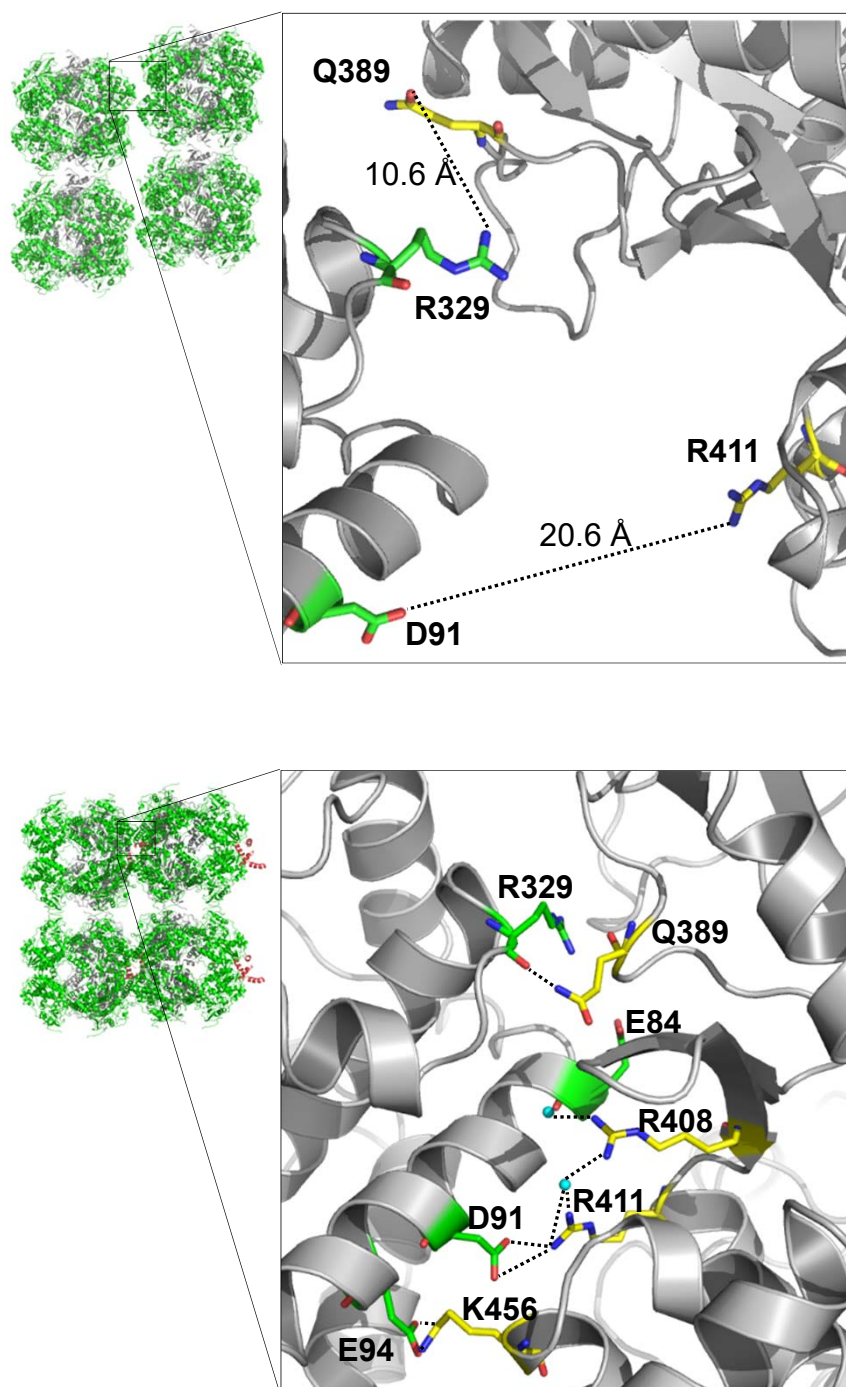

**Figure S4. Comparison of the interactions between RdRp and RdRp in the native and RdRp-VPg(1-73) complex structures.** The interactions between Arg329 and Gln389 and between Asp91 and Arg411 of adjacent RdRp molecules are absent in the native (upper panel), whereas they are distinctly different in the RdRp-VPg(1-73) complex structure (lower panel).
