# Supplementary material for: Insight Into the Interaction Between RNA Polymerase and VPg for Murine Norovirus Replication
Source: PubMed Central journal article supplement (PMC6046605; doi:10.3389/fmicb.2018.01466), 2018-07-03
Supplement: Presentation_5.pdf [file Presentation_5.pdf]

### D331A-VPg(1-124)

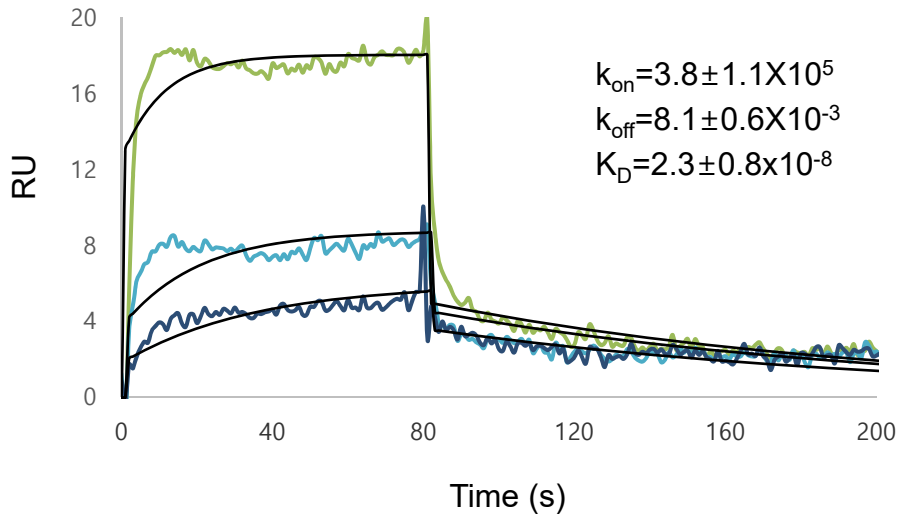

### L354D-VPg(1-124)

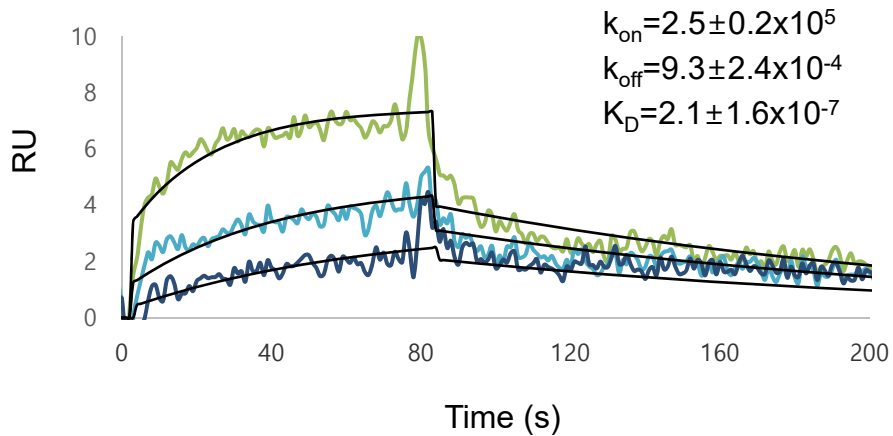

**Figure S5. SPR binding assay.** The SPR sensorgram to measure the affinity of VPg to RdRp D331A and L354D. The binding affinity constant ( $K_D$ ) was determined from the association ( $k_{on}$ ) and dissociation ( $k_{off}$ ) rates by evaluating the 1:1 Langmuir binding model kinetics in the sensorgrams. Colored curves depict experimental data at different analyte concentrations and fitted curves modelled to describe a 1:1 binding event are overlaid in black. The experiments were performed in duplicates.
