# Supplementary material for: Insight Into the Interaction Between RNA Polymerase and VPg for Murine Norovirus Replication
Source: Front Microbiol. 2018 Jul 3;9:1466. doi: 10.3389/fmicb.2018.01466 (PMC6046605; doi:10.3389/fmicb.2018.01466)
Supplement: Supplementary file 2 [file Presentation_2.pdf]

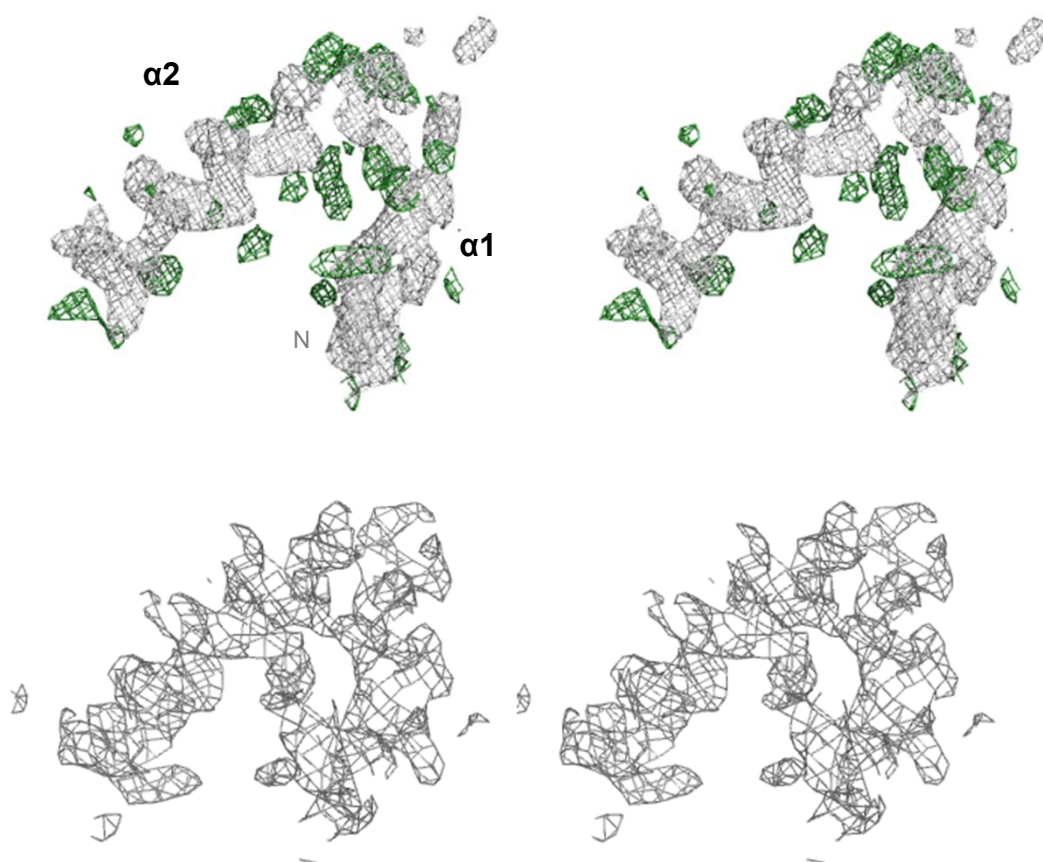

**Figure S2. Stereo view of the electron density maps.** (Upper panel) the  $2|F_o|-|F_c|$  electron density maps (0.7  $\sigma$  in gray maps) with the positive  $|F_o|-|F_c|$  electron density maps (red density) and simulated annealing omit maps (1.2  $\sigma$  in gray maps) showing unbiased electron densities (lower panel) for VPg in the RdRp-VPg(1-73) complex.
